# Supplementary material
Source: PubMed Central journal article supplement (PMC6867867)
Supplement: IAI.00732-19-s0001.pdf [file IAI.00732-19-s0001.pdf]

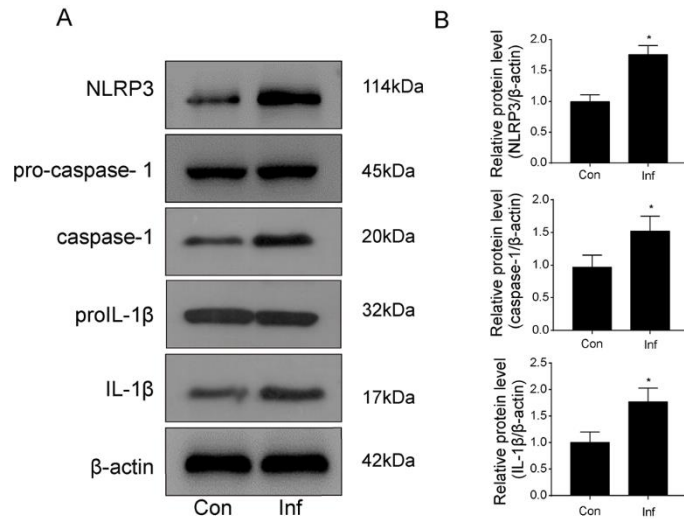

**Figure S1 NLRP3 inflammasome is activated in the liver of mice with *S. japonicum* infection.** Wild-type mice were percutaneously treated with or without  $30 \pm 2$  *S. japonicum* cercaria. At 6 weeks post-infection, liver tissue was collected to analyze protein expression of NLRP3, caspase-1 and IL-1 $\beta$ . (A) Western blot analysis of protein levels of NLRP3, pro-caspase-1, caspase-1, proIL-1 $\beta$  and IL-1 $\beta$  in liver and (B) quantification. Data are as mean  $\pm$  SEM (n=6 in each group) of three independent experiments. Con: control group; Inf: infected group. \*P<0.05 vs Con.
